# Supplementary material for: Atypical Time Course of Object Recognition in Autism Spectrum Disorder
Source: PubMed Central journal article supplement (PMC5067503; doi:10.1038/srep35494), 2016-10-18
Supplement: srep35494-s1.pdf [file srep35494-s1.pdf]

**Atypical Time Course of Object Recognition in Autism Spectrum Disorder**  
**(Supplementary Information File)**

Laurent Caplette<sup>1\*</sup>, Bruno Wicker<sup>2</sup>, & Frédéric Gosselin<sup>1</sup>

<sup>1</sup>Département de psychologie, Université de Montréal

<sup>2</sup>Institut de Neurosciences de la Timone, CNRS UMR 7289, Aix-Marseille Université

\*Corresponding author. Email: laurent.caplette@umontreal.ca

## Supplementary Video Legends

**Video S1.** Example of a stimulus.

**Video S2.** Example of a stimulus (slowed down 10x).
